# Supplementary material for: Pt loaded onto silicon carbide/porous carbon hybrids as an electrocatalyst in the methanol oxidation reaction
Source: Royal Society of Chemistry journal article supplement (doi:10.1039/c4ra09216c), 2014-09-23
Supplement: c4ra09216c1.pdf [file c4ra09216c1.pdf]

## Support information

### Pt Loaded on Silicon Carbide/Porous Carbon Hybrid as an excellent Electrocatalyst for Methanol Oxidation Reaction

*Liming Jiang,<sup>a</sup> Honggang Fu,<sup>\* a,b</sup> Lei Wang,<sup>b</sup> Wei Zhou,<sup>b</sup> Baojiang Jiang,<sup>b</sup> and Ruihong*

*Wang<sup>b</sup>*

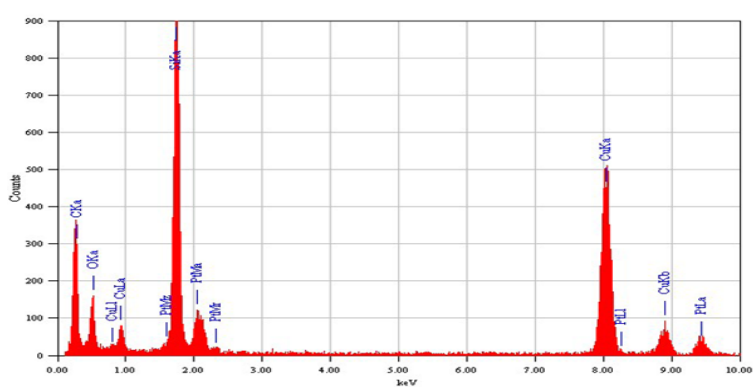

**Figure S1.** The EDS pattern of Pt/SiC-PC-1300 catalyst.

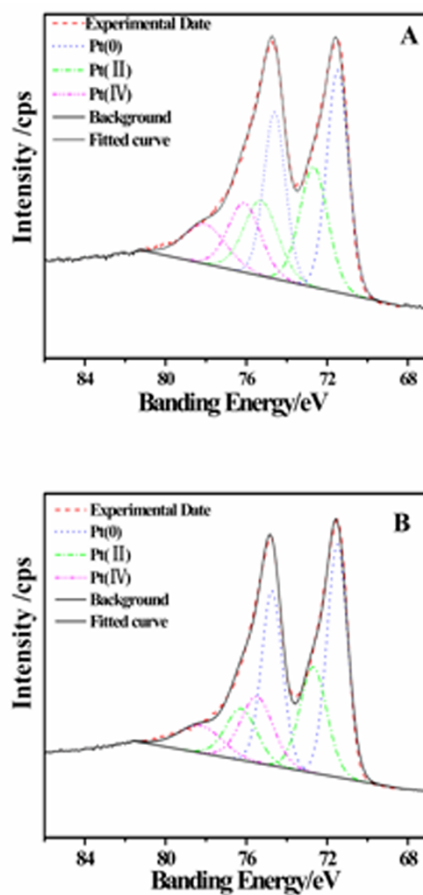

**Figure S2.** High resolution Pt 4f XPS spectra of (A) Pt/PC and (B) Pt/SiC-PC-1300 catalysts.

**Table S1** Binding energies and relative intensities of XPS spectra of Pt species in catalysts.

| Catalyst       | Species          | Binding energy (eV)    |                        | Relative intensity (%) |
|----------------|------------------|------------------------|------------------------|------------------------|
|                |                  | Pt(4f <sub>7/2</sub> ) | Pt(4f <sub>5/2</sub> ) |                        |
| Pt/PC-1300     | Pt metal         | 71.4                   | 74.6                   | 47.73                  |
|                | PtO              | 72.6                   | 76.2                   | 29.87                  |
|                | PtO <sub>2</sub> | 75.3                   | 78.2                   | 22.40                  |
| Pt/SiC-PC-1300 | Pt metal         | 71.5                   | 74.7                   | 52.03                  |
|                | PtO              | 72.7                   | 76.3                   | 27.42                  |
|                | PtO <sub>2</sub> | 75.5                   | 78.3                   | 20.55                  |

**Table S2** Electrochemical activities towards methanol oxidation of Pt/SiC-PC-1200, Pt/SiC-PC-1300, and Pt/SiC-PC-1400 catalysts.

| Catalyst       | Onset potential<br>(V) | Peak current<br>(A /g Pt) | Peak Potential<br>(V) | Residual current after 3600s<br>(A /g Pt) |
|----------------|------------------------|---------------------------|-----------------------|-------------------------------------------|
| Pt/SiC-PC-1200 | 0.21                   | 421.42                    | 0.74                  | 171.00                                    |
| Pt/SiC-PC-1300 | 0.21                   | 836.93                    | 0.72                  | 202.12                                    |
| Pt/SiC-PC-1400 | 0.21                   | 338.18                    | 0.76                  | 131.00                                    |
